# Supplementary material for: Effect of the Friendship Bench Intervention on Antiretroviral Therapy Outcomes and Mental Health Symptoms in Rural Zimbabwe: A Cluster Randomized Trial
Source: PubMed Central journal article supplement (PMC10346120; doi:10.1001/jamanetworkopen.2023.23205), 2023-07-13
Supplement: jamanetwopen-e2323205-s003.pdf [file jamanetwopen-e2323205-s003.pdf]

\*First name, last name, and suffix (if applicable) are required and will appear in PubMed.

| <b>*Group Name(s): Friendship Bench -ART trial group</b> |                   |                              |                         |                              |                                                 |                                                                |                                                                                                   |
|----------------------------------------------------------|-------------------|------------------------------|-------------------------|------------------------------|-------------------------------------------------|----------------------------------------------------------------|---------------------------------------------------------------------------------------------------|
| <b>*First Name and Middle Initial(s)</b>                 | <b>*Last Name</b> | <b>*Suffix (eg, Jr, III)</b> | <b>Academic Degrees</b> | <b>Institution</b>           | <b>Location (city, state/province, country)</b> | <b>Role or Contribution, eg, chair, principal investigator</b> | <b>Group (if more than 1 Group listed in the byline) and/or Subgroup (eg, Steering Committee)</b> |
| Amos                                                     | Kateta            |                              | BSc, MSc                | SolidarMed Zimbabwe          | Masvingo                                        | Research Assistant                                             |                                                                                                   |
| Cuthbert                                                 | Mutonhodza        |                              | MSc                     | SolidarMed Zimbabwe          | Masvingo                                        | Research Assistant                                             |                                                                                                   |
| Favourite                                                | Machiha           |                              | BA                      | SolidarMed Zimbabwe          | Masvingo                                        | Research Assistant                                             |                                                                                                   |
| Ntandoyenkosi                                            | Mhlanga           |                              | BSc                     | SolidarMed Zimbabwe          | Masvingo                                        | Research Assistant                                             |                                                                                                   |
| Shingai                                                  | Matutururu        |                              | MSc                     | SolidarMed Zimbabwe          | Masvingo                                        | Research Assistant                                             |                                                                                                   |
| Tatenda                                                  | Gombwiro          |                              | BSc                     | SolidarMed Zimbabwe          | Masvingo                                        | Research Assistant                                             |                                                                                                   |
| Millicent                                                | Gweredza          |                              | BA                      | SolidarMed Zimbabwe          | Masvingo                                        | Research Assistant                                             |                                                                                                   |
| Josephine Yasmin                                         | Saide             |                              | MSc                     | SolidarMed Zimbabwe          | Masvingo                                        | Research Assistant                                             |                                                                                                   |
| Beauty                                                   | Muchakubvura      |                              | MSc                     | SolidarMed Zimbabwe          | Masvingo                                        | Research Assistant                                             |                                                                                                   |
| Kudzai                                                   | Mhlanga           |                              | MPA                     | SolidarMed Zimbabwe          | Masvingo                                        | Research Assistant                                             |                                                                                                   |
| Dennis                                                   | Mwakasa           |                              | BA                      | SolidarMed Zimbabwe          | Masvingo                                        | Research Assistant                                             |                                                                                                   |
| Fungai Nyikadzino                                        | Zvekare           |                              | MSc                     | SolidarMed Zimbabwe          | Masvingo                                        | Research Assistant                                             |                                                                                                   |
| Yvonne Chiedza                                           | Maumbe            |                              | BSc, MPH                | SolidarMed Zimbabwe          | Masvingo                                        | Research Assistant                                             |                                                                                                   |
| Boldwin                                                  | Maposa            |                              | BSc                     | SolidarMed Zimbabwe          | Masvingo                                        | Research Assistant                                             |                                                                                                   |
| Sibongile                                                | Gumbo             |                              | MSc                     | SolidarMed Zimbabwe          | Masvingo                                        | Research Assistant                                             |                                                                                                   |
| Japhet                                                   | Kamusha           |                              | MSc                     | SolidarMed Zimbabwe          | Masvingo                                        | Research Assistant                                             |                                                                                                   |
| Morris                                                   | Tshuma            |                              | BSc, MSc                | SolidarMed Zimbabwe          | Masvingo                                        | Research Assistant                                             |                                                                                                   |
| Rejoyce                                                  | Runyowa           |                              | MSc, BSc                | SolidarMed Zimbabwe          | Masvingo                                        | Research Assistant                                             |                                                                                                   |
| Abigail                                                  | Pikayi            |                              | MSc, BSc, BA            | SolidarMed Zimbabwe          | Masvingo                                        | Research Assistant                                             |                                                                                                   |
| Fredrick                                                 | Mbiba             |                              | MSc                     | SolidarMed Zimbabwe          | Masvingo                                        | Research Assistant                                             |                                                                                                   |
| Chiedza Elizabeth                                        | Mutungama         |                              | MSc, BSc                | SolidarMed Zimbabwe          | Masvingo                                        | Research Assistant                                             |                                                                                                   |
| Waraidzo AM                                              | Mukuwapasi        |                              | MSc                     | SolidarMed Zimbabwe          | Masvingo                                        | Research Assistant                                             |                                                                                                   |
| Rudo                                                     | Mandabva          |                              | BSc                     | SolidarMed Zimbabwe          | Masvingo                                        | Research Assistant                                             |                                                                                                   |
| Sven                                                     | Trelle            |                              | MD                      | CTU Bern, University of Bern | Bern, Switzerland                               | Study design                                                   |                                                                                                   |
| Ethel                                                    | Manda             |                              | BSc                     | Friendship Bench             | Harare                                          | Friendship Bench trainer                                       |                                                                                                   |
| Duncan Tatenda                                           | Majichi           |                              | MSc                     | Friendship Bench             | Harare                                          | Friendship Bench trainer                                       |                                                                                                   |
