# Supplementary material for: Effect of the Friendship Bench Intervention on Antiretroviral Therapy Outcomes and Mental Health Symptoms in Rural Zimbabwe: A Cluster Randomized Trial
Source: PubMed Central journal article supplement (PMC10346120; doi:10.1001/jamanetworkopen.2023.23205), 2023-07-13
Supplement: jamanetwopen-e2323205-s004.pdf [file jamanetwopen-e2323205-s004.pdf]

## Data Sharing Statement

Haas. Effect of the Friendship Bench Intervention on Antiretroviral Therapy Outcomes and Mental Health Symptoms in Rural Zimbabwe. *JAMA Netw Open*. Published July 13, 2023. doi:10.1001/jamanetworkopen.2023.23205

### Data

**Data available:** No

### Additional Information

**Explanation for why data not available:** Data cannot be made available online because of legal and ethical restrictions. To request data, readers may contact leDEA-SA for consideration.
